# Supplementary material for: Understanding Mechanisms of Salinity Tolerance in Barley by Proteomic and Biochemical Analysis of Near-Isogenic Lines
Source: Int J Mol Sci. 2020 Feb 22;21(4):1516. doi: 10.3390/ijms21041516 (PMC7073193; doi:10.3390/ijms21041516)
Supplement: Supplementary file 1 [file ijms-21-01516-s001.xlsx]

## Sheet: Table1
Table S1. Peptide information of differentially expressed proteins identified by tandem mass spectrometry in leaves.
Spot No.	Gene ID	Chr. Position	Best Protein Mass	Best Protein Score	Description	Functional category
Down-regulated in response tosalt stress in both N33 and T46
113	HORVU2Hr1G041260	chr2H:202964708-202970876	32431	335	thylakoid membrane formation 1	photosynthesis
289	HORVU0Hr1G039090	chrUn:248040453-248042437	29380	521	harpin binding protein 1	cell.organisation
Up-regulated in response to salt stress in both N33 and T46
55	HORVU4Hr1G027260	chr4H:166877788-166885290	51334	721	ribulose bisphosphate carboxylase/oxygenase activase A, chloroplastic	photosynthesis
62	HORVU4Hr1G066860	chr4H:555802026-555805554	46901	550	glutamine synthetase 1	N-metabolism
87	HORVU5Hr1G033480	chr5H:224777854-224832890	35202	232	adenylate kinase 1	nucleotide metabolism
202	HORVU7Hr1G000900	chr7H:1865911-1869063	15769	193	plastocyanin	photosynthesis
210	HORVU1Hr1G048130	chr1H:355734512-355734757	9406	189	photosystem I iron-sulfur center	photosynthesis
212	HORVU6Hr1G076980	chr6H:527779355-527779768	6126	196	ubiquitin	protein.degradation
275	HORVU4Hr1G019570	chr4H:94602390-94605682	42160	103	fructose-bisphosphate aldolase 2	photosynthesis
277	HORVU7Hr1G097250	chr7H:591550703-591556171	48566	313	peptidyl-prolyl cis-trans isomerase B	cell.division
279	HORVU5Hr1G081010	chr5H:562729113-562732694	34807	55	6-phosphogluconolactonase	oxidative pentose phosphate
295	HORVU6Hr1G059510	chr6H:393855098-393857796	43450	213	ATP-dependent Clp protease proteolytic subunit	protein.degradation
317	HORVU2Hr1G057700	chr2H:371442220-371443669	34678	327	oxygen-evolving enhancer protein 1	photosynthesis
324	HORVU4Hr1G090300	chr4H:644845317-644848105	26521	164	transcriptional coactivator/pterin dehydratase	unkown
349	HORVU1Hr1G090710	chr1H:546756993-546817241	38081	403	malate dehydrogenase 1, mitochondrial-like	TCA
352	HORVU2Hr1G057700	chr2H:371442220-371443669	34678	327	oxygen-evolving enhancer protein 1, chloroplastic	photosynthesis
367	HORVU3Hr1G097950	chr3H:657358643-657360240	23557	96	glutathione S-transferase family protein	redox
505	HORVU1Hr1G090710	chr1H:546756993-546817241	38081	253	alate dehydrogenase	TCA
518	HORVU1Hr1G039870	chr1H:281464347-281466812	18579	117	cyanate hydratase	secondary metabolism
521	HORVU3Hr1G006530	chr3H:15708139-15708947	23199	127	16.9 kDa class I heat shock protein 1	stress
Up-regulated in response to salt stress in salt tolerance only in T46
102	HORVU7Hr1G058950	chr7H:262015654-262020074	32107	282	RNA-binding protein 1	RNA.binding
111	HORVU5Hr1G098000	chr5H:606265773-606270239	29214	108	thioredoxin superfamily protein	protein.assembly and cofactor ligation
126	HORVU3Hr1G013350	chr3H:28804800-28808275	32526	674	triosephosphate isomerase	glycolysis
127	HORVU3Hr1G078820	chr3H:580440661-580443718	29380	730	photosystem II reaction center PsbP family protein	photosynthesis
162	HORVU3Hr1G059810	chr3H:454648311-454649602	22066	254	50S ribosomal protein L7/L12, chloroplastic	protein.synthesis
226	HORVU3Hr1G065580	chr3H:499361233-49936365	52462	171	plastid transcriptionally active 16	RNA.transcription
250	HORVU6Hr1G004860	chr6H:10437494-10439223	42909	212	3-beta hydroxysteroid dehydrogenase	RNA.regulation of transcription
251	HORVU7Hr1G090850	chr7H:553381261-553382864	43340	51	fructose-bisphosphate aldolase 2, chloroplastic	photosynthesis
266	HORVU4Hr1G019570	chr4H:94602390-94605682	42160	103	fructose-bisphosphate aldolase 2, chloroplastic	photosynthesis
319	HORVU2Hr1G073760	chr2H:532288077-532292322	28440	965	Peroxiredoxin-2	redox
519	HORVU7Hr1G060130	chr7H:273940065-273953143	26468	384	superoxide dismutase [Cu-Zn]	redox
528	HORVU2Hr1G041610	chr2H:205975062-205976096	24252	530	cytochrome b6-f complex iron-sulfur subunit	photosynthesis
Down-regulated in response to salt stress in salt tolerance only in N33
11	HORVU6Hr1G049250	chr6H:299512573-299514069	53898	1650	ATP synthase subunit beta, chloroplastic	photosynthesis
25	HORVU7Hr1G096140	chr7H:586305338-586311288	23729	420	thylakoid lumenal 16.5 kDa protein, chloroplastic	unkown
31	HORVU4Hr1G057450	chr4H:482248980-482250693	30418	144	50S ribosomal protein L10	protein.synthesis
83	HORVU7Hr1G002210	chr7H:4280606-4282822	39426	696	ferredoxin--NADP reductase, leaf-type isozyme, chloroplastic	photosynthesis
104	HORVU2Hr1G040780	chr2H:197904114-197905309	28798	207	chlorophylla-b binding protein 13, chloroplastic	photosynthesis
124	HORVU4Hr1G074810	chr4H:595768608-595772239	6140	30.1	D-ribulose-5-phosphate-3-epimerase	photosynthesis
201	HORVU5Hr1G022750	chr2H:532288077-532292322	28440	965	peroxiredoxin-2	redox
156	HORVU2Hr1G002600	chr2H:5689544-5692391	13285	183	inosine-5'-monophosphate dehydrogenase	unknow
Up-regulated in response to salt stress in salt tolerance only in N33
69	HORVU4Hr1G013530	chr4H:47788040-47793161	54429	224	aldo-keto reductase	minor CHO metabolism
71	HORVU6Hr1G000640	chr6H:1589235-1590268	42268	237	glyoxylate/hydroxypyruvate reductase B	amino acid metabolism
93	HORVU2Hr1G080710	chr2H:584988817-584990934	30578	69	prohibitin-3	cell.division
108	HORVU0Hr1G018510	chrUn:97991367-97995482	35623	299	mitochondrial ATP synthase precursor	glycolysis
117	HORVU5Hr1G062310	chr5H:485025060-485029334	26043	430	10 kDa chaperonin	protein.folding
137	HORVU4Hr1G033200	chr4H:229702183-229704374	18929	249	translationally controlled tumor protein	development
180	HORVU1Hr1G073640	chr1H:504078029-504080009	11497	87	60S acidic ribosomal protein family	unknow
230	HORVU5Hr1G002040	chr5H:5791336-5796232	48427	480	Enolase	glycolysis
259	HORVU5Hr1G116360	chr5H:648002783-648006801	43114	75	phosphoribosylformylglycinamidine cyclo-ligase	nucleotide metabolism
282	HORVU6Hr1G087720	chr6H:564916467-564918196	32602	406	hioredoxin-like protein 2-2 , chloroplastic	redox
312	HORVU1Hr1G067300	chr1H:477744823-477747350	40262	295	phosphoglycerate kinase 1	photosynthesis
370	HORVU2Hr1G038570	chr2H:181668527-181673190	32638	312	ribosome-recycling factor	cell.division
382	HORVU3Hr1G058460	chr3H:441092843-441096307	35601	736	malate dehydrogenase	amino acid metabolism

## Sheet: Table2
Table S2. Peptide information of differentially expressed proteins identified by tandem mass spectrometry in roots.
Spot No.	Gene ID	Chr. Position	Best Protein Mass	Best Protein Score	Description	Functional category
Down-regulated in response tosalt stress in both N33 and T46
66	HORVU1Hr1G011990	chr1H:29888028-29888437	8010	80	CI2C(Chymotrypsin inhibitor)	unkown
90	HORVU7Hr1G071730	chr7H:398115734-398122739	42873	250	transaldolase	oxidative pentose phosphate
144	HORVU6Hr1G014610	chr6H:31198208-31201393	15778	50	Eukaryotic translation initiation factor 3 subunit F	protein.degradation
297	HORVU4Hr1G003120	chr4H:6231239-6234150	16433	386	dUTP pyrophosphatase	nucleotide metabolism
423	HORVU7Hr1G006160	chr7H:8000958-8002650	54634	348	6-phosphogluconate dehydrogenase, decarboxylating 1	oxidative pentose phosphate
425	HORVU5Hr1G040870	chr5H:305525562-305528748	29050	51	unknown	unkown
439	HORVU6Hr1G084640	chr6H:555716204-555717459	10699	325	membrane-associated progesterone binding protein 2	redox
540	HORVU3Hr1G047510	chr3H:323644309-323646954	14370	487	V-type proton ATPase subunit F	transport
693	HORVU3Hr1G114790	chr3H:691668843-691669337	18479	214	pathogenesis-related 1 protein	stress
UP-regulated in response tosalt stress in both N33 and T46
115	HORVU1Hr1G075160	chr1H:510049345-510050498	33679	322	isoflavone reductase-like protein	secondary metabolism
160	HORVU3Hr1G031850	chr3H:160127910-160130104	31155	413	salt stress root protein RS1	unkown
221	HORVU3Hr1G013350	chr3H:28804800-28808275	32526	674	triosephosphate isomerase	glycolysis
263	HORVU1Hr1G066240	chr1H:471472632-471476335	32085	408	NAD(P)H dehydrogenase(quinone)	lipid metabolism
311	HORVU7Hr1G054440	hr7H:217284728-217287615	17529	350	nuclear transport factor 2A	protein.targeting
320	HORVU1Hr1G070690	chr1H:490781306-490782457	17659	273	PEBP(phosphatidylethanolamine-binding protein)	unkown
321	HORVU3Hr1G006530	chr3H:15708139-15708947	23199	127	16.9 kDa class I small heat shock protein	stress
331	HORVU3Hr1G006530	chr3H:15708139-15708947	23199	242	16.9 kDa class I small heat shock protein	stress
527	HORVU4Hr1G060720	chr4H:509850028-509850516	17533	472	17.9 kDa class I heat shock protein	stress
721	HORVU5Hr1G066230	chr5H:505607855-505608754	14865	102	superoxide dismutase [Cu-Zn]	redox
764	HORVU2Hr1G111600	chr2H:723245510-723247634	24244	188	adenine nucleotide alpha hydrolases-like superfamily protein	stress
Up-regulated in response to salt stress in T46 while down-regulated in N33
187	HORVU4Hr1G057170	chr4H:480836359-480839097	33167	120	peroxidase superfamily protein	redox
287	HORVU2Hr1G052880	chr2H:318874169-318877423	13794	110	ATP synthase subunit delta, mitochondrial	mitochondrial electron transport
Down-regulated in response to salt stress in salt tolerance only in T46
362	HORVU0Hr1G011720	chrUn:66978395-66979517	17464	104	major pollen allergen Bet v 1-B	unkown
Up-regulated in response to salt stress in salt tolerance only in T46
36	HORVU2Hr1G004420	chr2H:9808990-9810524	55525	100	ATP synthase subunit alpha	mitochondrial electron transport
97	HORVU3Hr1G088500	chr3H:625196307-625197542	24358	416	fructose-bisphosphate aldolasealdolase 2	glycolysis
102	HORVU3Hr1G058460	chr3H:441092843-441096307	35601	736	peroxidase superfamily protein	redox
109	HORVU2Hr1G124960	chr2H:759783796-759785186	39594	366	peroxidase superfamily protein	redox
149	HORVU5Hr1G081010	chr5H:562729113-562732694	34807	55	6-phosphogluconolactonase	oxidative pentose phosphate
167	HORVU2Hr1G075970	chr2H:547564037-547569898	45060	104	peroxidase superfamily protein	redox
228	HORVU3Hr1G074040	chr3H:556701735-556704983	32548	107	glutathione-S-transferase	redox
245	HORVU3Hr1G097950	chr3H:657358643-657360240	23557	96	glutathione S-transferase family protein	redox
322	HORVU2Hr1G072660	chr2H:521460787-521462956	19569	238	ATP synthase D chain, mitochondrial	mitochondrial electron transport
354	HORVU5Hr1G055360	chr5H:434306622-434309646	17574	233	ubiquitin-conjugating enzyme E2 35	protein.degradation
388	HORVU1Hr1G000920	chr1H:2415651-2417084	19772	157	dirigent protein 21	unkown
420	HORVU7Hr1G075240	chr7H:435465264-435467545	22029	155	calcium-binding protein CML7	protein.postranslational modification
491	HORVU5Hr1G033480	chr5H:224777854-224832890	35202	116	Adenylate kinase 1	nucleotide metabolism
765	HORVU5Hr1G006330	chr5H:11067373-11069325	14634	158	glutathione S-transferase family protein	unkown
767	HORVU2Hr1G104220	chr2H:702269776-702274319	28164	107	germin-like protein	stress
Down-regulated in response to salt stress in salt tolerance only in N33
0	HORVU5Hr1G062310	chr5H:485025060-485029334	26043	179	10 Kda chaperonin	protein.folding
7	HORVU6Hr1G058750	chr6H:384798191-384803748	37605	295	adenosine kinase 1	nucleotide metabolism
135	HORVU7Hr1G085220	chr7H:515355125-515359768	38971	155	enoyl-[acyl-carrier-protein] reductase [NADH]	lipid metabolism
242	HORVU1Hr1G052430	chr1H:388642041-388643670	27377	211	Chitinase family protein	stress
285	HORVU4Hr1G059170	chr4H:494939586-494941181	21357	147	NAD(P)H dehydrogenase (quinone) FQR1-like	lipid metabolism
376	HORVU1Hr1G055440	chr1H:406338102-406342417	16636	902	Nucleoside diphosphate kinase family protein	nucleotide metabolism
405	HORVU2Hr1G056360	2H:355976727-355985671	12916	399	thioredoxin superfamily protein	redox
468	HORVU6Hr1G090510	chr6H:572778586-572780394	40098	73	O-methyltransferase family protein	secondary metabolism
496	HORVU2Hr1G080710	chr2H:584988817-584990934	30578	75	prohibitin	cell.division
Up-regulated in response to salt stress in salt tolerance only in N33
103	HORVU7Hr1G108580	chr7H:625762700-625768671	42936	82	dehydrogenase C2	glycolysis
306	HORVU7Hr1G096900	chr7H:590153839-590155239	22860	270	stress responsive protein	redox
329	HORVU4Hr1G054870	chr4H:459813105-459814158	24443	141	major pollen allergen Bet v 1-B	unkown
500	HORVU4Hr1G081150	chr4H:618501669-618502982	25542	113	glutathione S-transferase 7	redox
